# Supplementary material
Source: MDPI journal article supplement (https://www.mdpi.com/2077-0472/7/3/21)
Supplement: s1 [file s1]

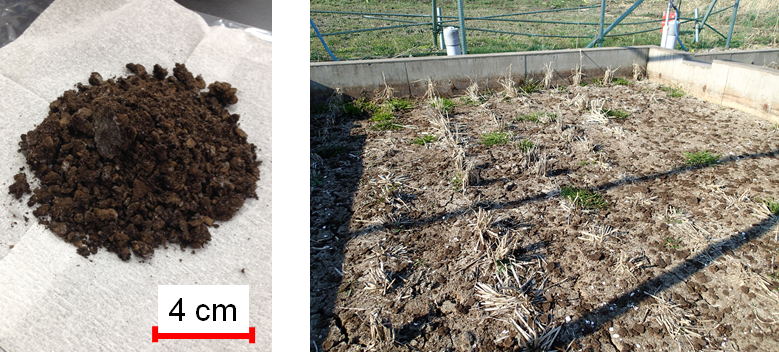


**Figure S1.** Ethanol production residue used to this study (left) and the experimental plot after scattering the residue (right).


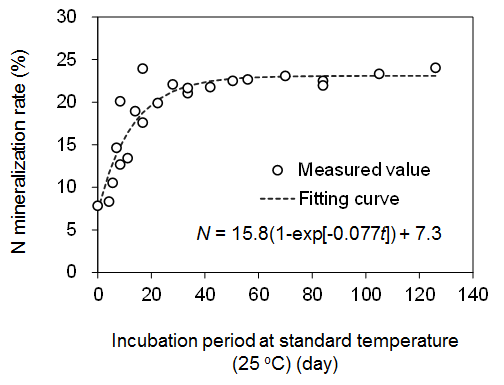


**Figure S2.** Nitrogen (N) mineralization rate of the bio-ethanol production residue used in this study. Mineralized N was evaluated as ammonium–N released by an incubation mixed with soil (150 mg N 100g-1 dry soil) under flooded condition. N mineralization rate was calculated by dividing the amount of mineralized N by the amount of applied N. The measured value was fitted with the following equation based on kinetics analysis. *N* = *N0*(1-exp[*kt*]) + *I*; where *N*, N mineralization rate (%); *N0*, rate of potentially mineralizable N (%); *k*, rate constant (day-1); *t*, time (day), *I*, rate of initially mineralized N(%).
